# Supplementary material for: Effect of a Phosphorus Additive on Luminescent and Scintillation Properties of Ceramics GYAGG:Ce
Source: MDPI journal article supplement (doi:10.3390/ceramics6030091), 2023-07-06
Supplement: s1 [file s1]

Supplementary materials for

## Effect of a phosphorus additive on luminescent and scintillation properties of ceramics GYAGG:Ce

Lydia V. Ermakova <sup>1</sup>, Valentina G. Smyslova <sup>1</sup>, Valery V. Dubov <sup>1</sup>, Daria E. Kuznetsova <sup>1</sup>, Maria S. Malozovskaya <sup>1</sup>, Rasim R. Saifutiyarov <sup>1</sup>, Petr V. Karpyuk <sup>1</sup>, Petr S. Sokolov <sup>1,\*</sup>, Ilia Yu. Komendo <sup>1</sup>, Aliaksei G. Bondarau <sup>2</sup>, Vitaly A. Mechinsky <sup>2</sup> and Mikhail V. Korzhik <sup>2</sup>

<sup>1</sup> National Research Center “Kurchatov Institute”, 123098 Moscow, Russia

<sup>2</sup> Institute for Nuclear Problems, Belarus State University, 220030 Minsk, Belarus

\* Correspondence: sokolov-petr@yandex.ru

This PDF file includes:

Characterization of as-sintered garnet ceramics: X-ray diffraction, optical images, microstructure.

Figures S1, S2, S3 and the motivation for choosing ammonium dihydrogen phosphate as a model substance.

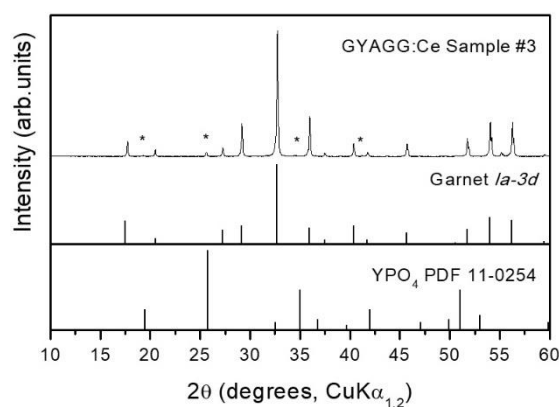

**Figure S1.** X-ray diffraction pattern of GYAGG:Ce ceramics sample # 3 (maximum phosphorus content). Bars for the garnet phase are given at the bottom (*Ia-3d* with lattice parameter  $a = 12.232$  Å). Garnet phase is a dominate in the pattern, but also easy to see a few weak and very weak lines, which can be attributed to tetragonal (*I4<sub>1</sub>/amd*) xenotime structure. Xenotime structure is typical modification for YPO<sub>4</sub> and YPO<sub>4</sub>-based solid solutions. Lines of monazite-type phosphates (typical for pure GdPO<sub>4</sub>) are not observed.

The motivation for choosing ammonium dihydrogen phosphate as a reasonable source of phosphorous are

- (1) NH<sub>4</sub>H<sub>2</sub>PO<sub>4</sub> is easily soluble in water and water-alcohol mixture, which allows it to be introduced into the precipitate homogeneously;
- (2) the thermal decomposition products of NH<sub>4</sub>H<sub>2</sub>PO<sub>4</sub> are well described in the literature (see references [41, 42 in the main text]). Phosphorus-containing decomposition products of phosphoric acid esters (PAEs) is identical or very close, namely phosphoric acids and/or phosphorus oxides. These products easily react with as-formed REE oxides. From the chemistry point of view, the processes of decomposition of NH<sub>4</sub>H<sub>2</sub>PO<sub>4</sub> and PAEs should be the same.

Also, NH<sub>4</sub>H<sub>2</sub>PO<sub>4</sub> is easily commercially available compound with good purity; it is a safe material and easy to work with. So NH<sub>4</sub>H<sub>2</sub>PO<sub>4</sub> is an appropriate model substance.

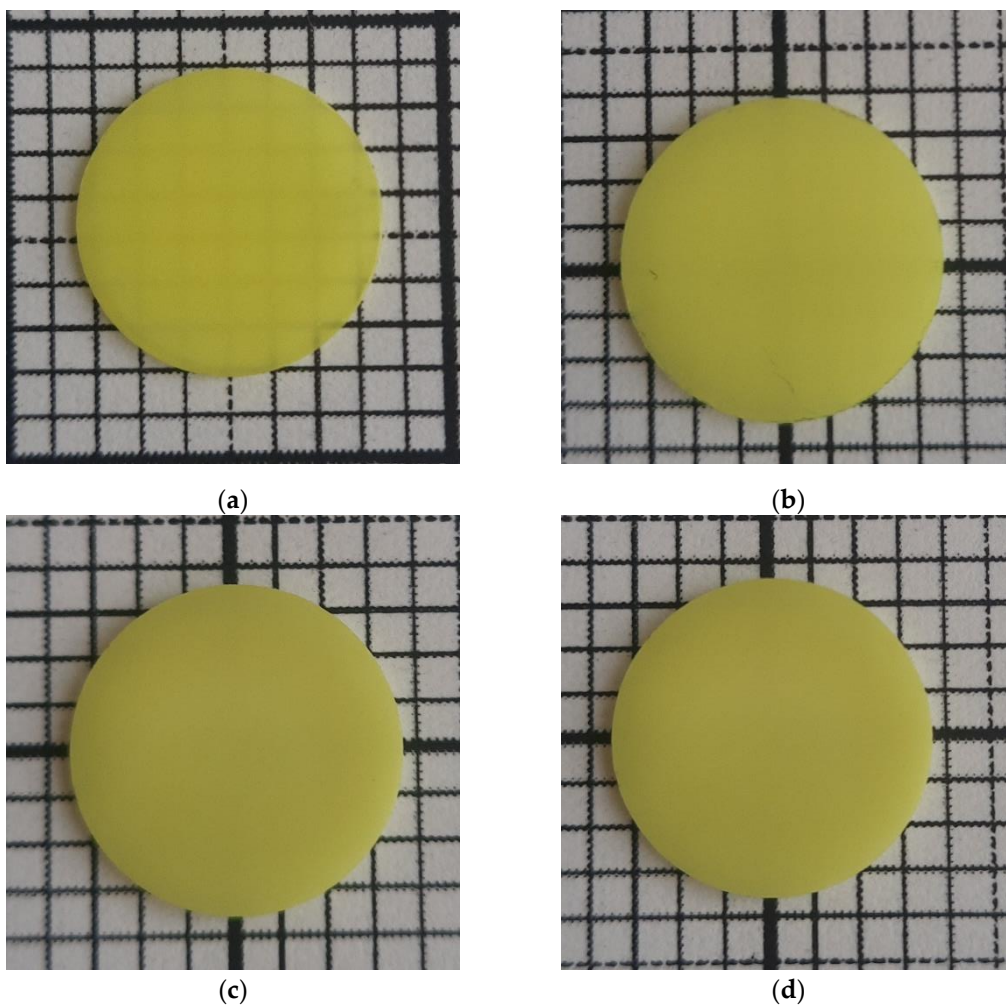

**Figure S2.** Optical images of GYAGG:Ce ceramics . (a) sample # 0; (b) sample # 1; (c) sample # 2; (d) sample # 3. Sample index 0 is reference ceramic without phosphorus additives; in other samples, the phosphorus content increases with increasing number. Scale bar 2 mm

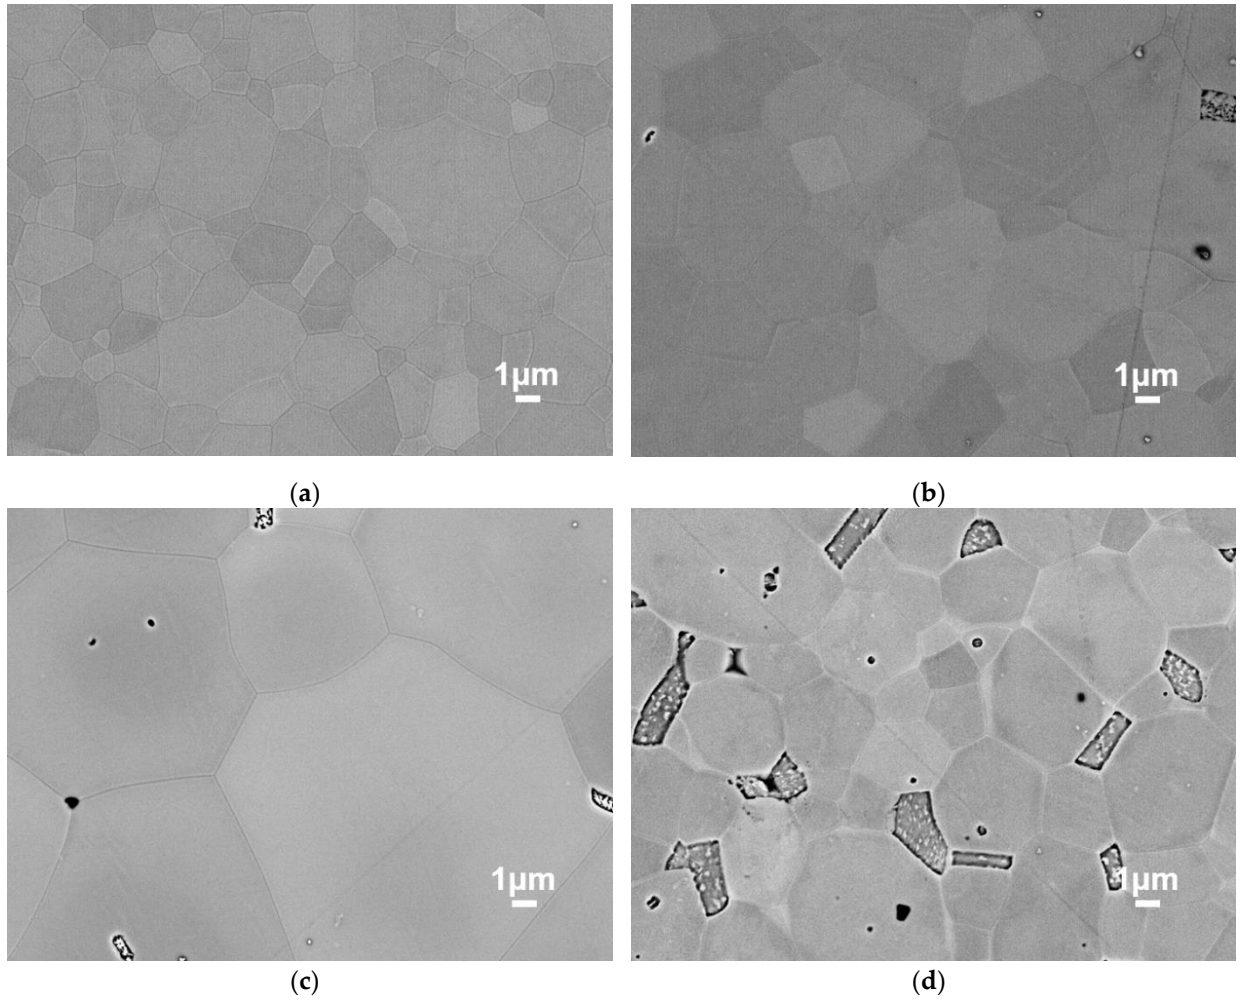

**Figure S3.** Representative SEM images (5000 $\times$ ) recorded in secondary electrons mode of mirror polished and thermally etched surfaces of GYAGG:Ce ceramics. (a) sample # 0; (b) sample # 1; (c) sample # 2; (d) sample # 3. Sample index 0 is reference ceramic without phosphorus additives; in other samples, the phosphorus content increases with increasing number. Scale bar 1  $\mu\text{m}$ .
